# Supplementary material for: Evaluation of two communication tools, slideshow and theater, to improve participants’ understanding of a clinical trial in the informed consent procedure on Pemba Island, Tanzania
Source: PLOS journal article supplement (doi:10.1371/journal.pntd.0009409), 2021-05-14
Supplement: S2 (10.1371/journal.pntd.0009409.s002) [file journal.pntd.0009409.s002]

**S2 Text.** Slideshow projected and presented to caregivers in parallel to the information shared orally (presented in S1 Text). \* Pictures that cannot be shown due to copy-right issues.

## Research study

## Minyoo

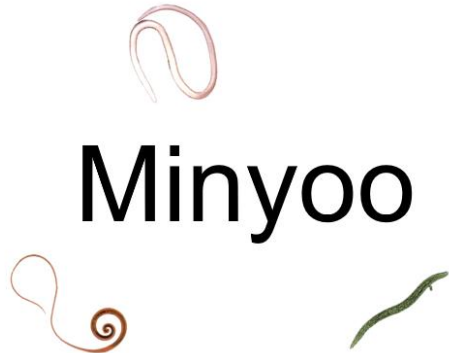

## Hookworm

\* Picture of barefoot feet in contact with soil with a hookworm larvae nearby.

## Hookworm

\* Picture of a child holding his abdomen.

## Problems

- Not grow well
- Not focus at school
- Not work so well

## Treatment for hookworm

## MEBENDAZOLE

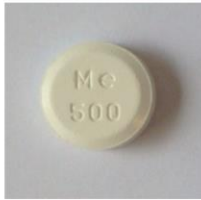

- 50 years
- safe
- dizzy or belly ache

## MEBENDAZOLE

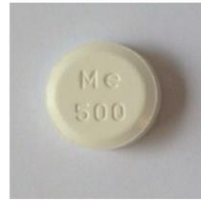

- too big
- bad taste

## New MEBENDAZOLE

\* Person  
chewing  
a tablet

**Chew** before  
swallowing

## MEBENDAZOLE

Old swallow

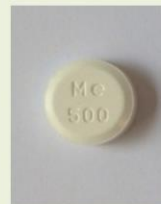

New chew

\* Person  
chewing  
a tablet

2 questions

**1. Which one kills more  
minyoo?**

Old swallow

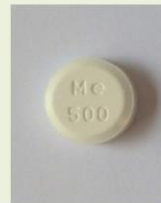

New chew

\* Person  
chewing  
a tablet

2. Which one do children like more?

Old swallow

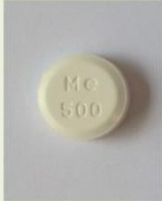

New chew

\* Person  
chewing  
a tablet

3 to 12 years old

Check stool

400 with  
hookworm

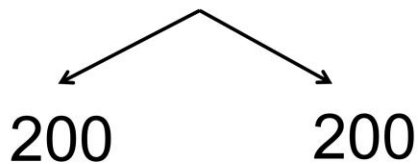

200

Old swallow

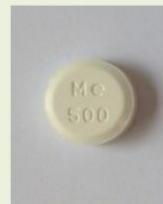

200

New chew

\* Person  
chewing  
a tablet

PARENT decides

What child needs  
to do?

2 stool samples

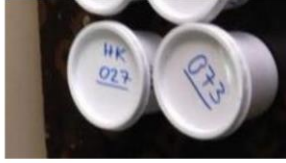

Doctor  
check

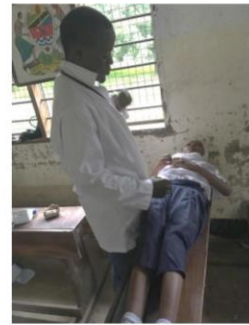

Small blood  
sample

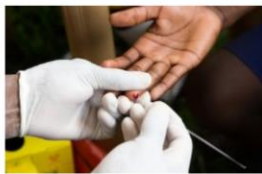

Girl and **10** years  
or older

Pregnancy test

Eat mebendazole

Tell us how feels  
day after

Wait 2 or 3 weeks

2 stool samples  
again

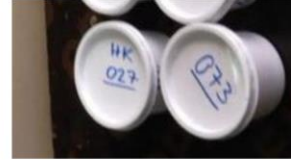

No problem to  
change your mind

Albendazole and  
ivermectin

Treatment is FREE

3'000 TSh  
transport

Only you and us  
see results

Thank you

Questions?
